# Supplementary material for: Retinal haemangioblastomas in von Hippel–Lindau germline mutation carriers: progression, complications and treatment outcome
Source: PubMed Central journal article supplement — Acta Ophthalmol. 2020 Jan 30;98(5):464–71. doi: 10.1111/aos.14360 (PMC7496349; doi:10.1111/aos.14360), 2020-01-30

**Figure S1:** Flow chart indicating VHL patients meeting the inclusion criteria.

VHL = von Hippel-Lindau; RH = retinal hemangioblastomas

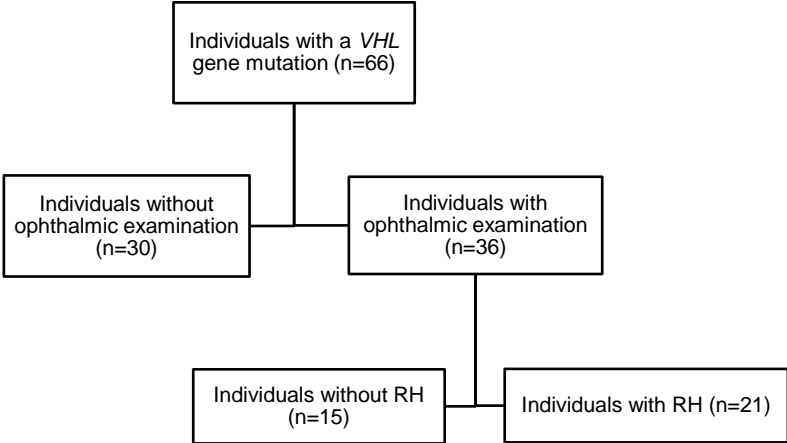

Supplement: AOS-98-464-s001.pdf [file AOS-98-464-s001.pdf]
