# Supplementary material for: Retinal haemangioblastomas in von Hippel–Lindau germline mutation carriers: progression, complications and treatment outcome
Source: PubMed Central journal article supplement — Acta Ophthalmol. 2020 Jan 30;98(5):464–71. doi: 10.1111/aos.14360 (PMC7496349; doi:10.1111/aos.14360), 2020-01-30
Supplement: AOS-98-464-s002.pdf [file AOS-98-464-s002.pdf]

**Table S1.** VHL gene mutation status of the analyzed pedigrees with the Human Genome Variation Society nomenclature on complementary and genomic DNA level.

| Pedigrees | gDNA Level                               | Expected gene change (cDNA)     |
|-----------|------------------------------------------|---------------------------------|
| 1         | Chr3(GRCh37): g.10182301_10188764del     | c.-1231_463+444del6464          |
| 2         | Unknown                                  | c.(?_1)_463+?del                |
| 3         | Chr3(GRCh37): g.10183758_10183760del     | c.227_229del                    |
| 4         | Chr3(GRCh37): g.10183764A>G              | c.233 A>G                       |
| 5         | Chr3(GRCh37): g.10184154_1019013delins14 | c.340+283_464-1335delins14      |
| 6         | Chr3(GRCh37): g.10184170_10189331del     | c.341-4028_463+1011del5162      |
| 7         | Chr3(GRCh37): g.10188245G>T              | c.388 G>T                       |
| 8         | Chr3(GRCh37): g.10191460T>A              | c.464-11 T>A                    |
| 9         | Chr3(GRCh37): g.10191480dup              | c.473dup                        |
| 10        | Unknown                                  | <i>VHL</i> full length deletion |
| 11        | Chr3(GRCh37): g.10191507G>A              | c.500 G>A                       |
| 12        | Chr3(GRCh37): g.10188309T>G              | c.452 T>G                       |
| 13        | Chr3(GRCh37): g.10183797T>C              | c.266 T>C                       |
| 14        | Chr3(GRCh37): g.10183722G>C              | c.191 G>C                       |
| 15        | Unknown                                  | <i>VHL</i> full length deletion |

cDNA = complementary DNA; gDNA = genomic DNA; del = deletion; dup = duplication; VHL = von Hippel-Lindau.
